1 Next-generation biocomputing: mimicking artificial neural network  
2 with genetic circuits

3 Leo Chi U Seak<sup>\*a</sup>, Owen Lok In Lo<sup>a1</sup>, Wade Chun-Wai Suen<sup>a1</sup>, Ming-Tsung Wu<sup>a1</sup>

4 a. Genenet Technology (UK) Limited, Kemp House, 160 City Road, London, United Kingdom,  
5 EC1V 2NX

6 1. These authors contributed equally and are listed alphabetically

7 \* **Corresponding author: Leo Chi U Seak**

8 **Email:** [chiuseak@gmail.com](mailto:chiuseak@gmail.com)

9 **Author Contributions:** L.C.U.S. conceptualized research, L.C.U.S., L.I.L., W.C.W.S., and  
10 M.T.W. designed research, performed research. L.C.U.S. wrote the paper. W.C.W.S., and  
11 M.T.W. edited the paper.

12 **Competing Interest Statement:** The authors declare no competing interest.

13 **Classification:** Physical Sciences: Biophysics and Computational Biology

14 **Keywords:** Biocomputing, artificial neural network, genetic circuits, synthetic biology

15 **This file includes:**

16 Main Text  
17 Figures 1 to 2  
18  
19  
20  
21  
22  
23  
24  
25  
26  
27  
28  
29  
30  
31  
32  
33  
34  
35  
36  
37  
38  
39  
40  
41  
42

## 43 **Abstract**

44 Artificial neural network (ANN) is nowadays one of the most used and researched computational  
45 methods. In the field of biocomputing, however, synthetic biologists are still using logic gate  
46 technologies to design genetic circuits. We here propose and computationally validate a novel  
47 method to mimic ANN with genetic circuits. We first describe the flow and the mathematical  
48 expression of this genetic circuit design and then we provide *in silico* proof to support the  
49 functionality of our method in regression and classification analyses. We believe that this *de novo*  
50 genetic circuit design method would have wide applications in biotechnology.

## 51 **Main Text**

### 52 **Introduction**

53  
54  
55  
56 In the last decade, genetic circuits have been used to simulate logic gates (1-3). In synthetic  
57 biology, these logic-gate genetic circuits have been applied to many different aspects including  
58 advanced cell therapy (4), chemical sensing (5), and clinical diagnosis (6). Although these studies  
59 promote the use of biocomputing from theoretical to clinical applications, the application of  
60 genetic circuit was not widely adapted because of the limited computing power of logic gate  
61 methodologies.

62 Machine learning is one of the most popular fields of research nowadays. Every year, thousands  
63 of papers were published to develop machine learning algorithms and their applications (7). Many  
64 of these algorithms, such as recurrent neural network and convolutional neural network, was  
65 developed based on artificial neural network (ANN). An ANN consists of multiple layers and each  
66 of them contains multiple nodes. These nodes are regarded as "neurons" in the ANN algorithm,  
67 which compute an output according to its activation function, weighting, biases and the current  
68 input (8).

69 Despite the fast growth of computing power and the great advances in machine learning,  
70 biocomputing in synthetic biology is still applying the out-of-date simple logic gates, an analog to  
71 the first generation of computers which can be dated back to the 1930s. In this paper, we  
72 describe a novel method to use genetic circuits to simulate ANNs and this method can unleash  
73 the potential of biocomputing algorithms to the next level. With the support of our computational  
74 models, we suggest that our method is feasible and applicable to solve real-world biocomputing  
75 problems.

## 76 **Results**

### 77 *Flow to design genetic circuit mimicking artificial neural network*

78  
79  
80 Artificial neural networks (ANNs) are sometimes regarded as black boxes. These "black boxes"  
81 are equivalent to a group of functions that can solve classification and regression problems, but it  
82 is difficult to explain its mechanism of working by mathematical approach (9). Each ANN consists  
83 of multiple layers and each layer has multiple nodes. Each of these nodes contains a function  
84 defined by the predefined parameters (such as activation functions, number of layers, and nodes)  
85 and the training of the network. When we carry out functional training to the network, it is  
86 essential to optimize the weighting and the biases of each node, in order to shape the function  
87 inside the nodes for more accurate predictions. As shown in figure 1A, the inputted data goes  
88 through the calculation inside each ANN node following the order of the layers: all calculated  
89 results will be passed through from the current layer to the next layer for further calculation inside  
90 each node until reaching the last output layer. Therefore, whether an ANN is successful or not  
91 relies on the mathematical functions inside each node (Fig. 1B; top), which its quality is  
92 determined by the activation function (Sigmoid, Relu, Tanh, etc), and the transfer function (Eq.1).

93 
$$\text{Transfer}(x) = \sum_i w_i x_i + b \quad \text{Eq. 1}$$

94 Where in a trained ANN, weighting  $w$  and biases  $b$  are fixed constants;  $x$  represents the input  
95 variable from the last hidden layer;  $i$  represents the number of nodes in the previous hidden layer.

96 Previous studies (10,11) found that many gene regulations have a shape of sigmoid function  
97 (Eq.2), which is also commonly used in ANNs *in silico*. We, therefore, chose the sigmoid function  
98 as the activation function to train our ANNs and mimic the transfer and activation functions using  
99 transcriptional or translational regulators.

100 
$$f(x_t) = \frac{1}{1+e^{-x_t}} \quad \text{Eq. 2}$$

101 In this sigmoid activation function, the output of the transfer function (Eq. 1) is used as the input  
102  $x^t$ . The  $e$  represents the *Euler's* number.

103 We can therefore mimic the ANN using genetic elements by matching the characteristics of  
104 genetic regulators to the trained ANN model, forming a genetic circuit that is the analog to a well-  
105 trained ANN in computer (Fig. 1B). The regulation status in each regulator binding site (e.g.  
106 transcription factors binding sites; RNA binding sites) can mimic the input of each node, and  
107 thereby the number of binding sites will be on the number of nodes in the previous layer. The  
108 promoters mimic the biases and the regulators (eg. transcription factors; regulatory RNAs) mimic  
109 the activation function.

110 We can then repeatedly match the reconstructed function from each node to the genetic  
111 regulatory elements (Fig. 1C). In practice, because each pair of regulator and binding site only  
112 has a single genetic regulation, the mimicking of the transfer function and activation function are  
113 conducted within one single function. We choose a regulator and its binding sites based on the  
114 weighting function from the current layer and the activation function from the previous layer, and  
115 then we get Eq. 3 (hypothesizing the regulations do not interact).

116  
117 
$$\text{Regulation} = w_i x_i = \frac{w_i}{1 + e^{-x_{t(i-1)}}} \quad \text{Eq. 3}$$
  
118

119 Where  $x_{t(i-1)}$  equals to transfer function from the node in the previous layer, which represents the  
120 quantity of the regulator from that previous node. When training an ANN *in silico*,  $w_i$  is the only  
121 variable used to improve the prediction power. Therefore, if we regard  $x_{t(i-1)}$  as  $x'$ , regulation as  
122  $y'$  ( $y'$  is a function of  $x'$ ), matching the  $w_i$  from pre-trained ANN to genetic regulations (regulators  
123 + binding sites) with sigmoid function, we can mimic the ANN using genetic circuits (as shown in  
124 Fig. 1C). The progress of matching the genetic regulators can be done by correlation analyses  
125 which correlate the functions estimated with Eq. 3 to the regulatory function according to the  
126 library of regulators and their binding sites.

127 Furthermore, we here also propose the flow (Fig. 1D) to generate a new validated ANN genetic  
128 circuit and it has three steps: (1) Training ANN models in the computer (2) Design and  
129 synthesizing genetic circuits according to the trained ANN (3) Functional testing of the genetic  
130 circuit.

### 131 *Computational validation of ANN genetic circuit*

132 We also built an ANN *in silico* to prove the feasibility of our proposed method. First, we simulated  
133 a data set consisted of three type of inputs ( $x_1, x_2, x_3$ ) and one output ( $Y$ ) in python. A set of 500  
134 triplet values( $x_1, x_2, x_3$ ), were pseudorandomly picked from any real number between 0 to 1. The  
135 actual  $Y$  value was calculated as:

136

$$Y = x_1 * (0.5 - x_2) + x_3$$

Eq. 4

137 We chose this equation (Eq. 4) to prove that ANN genetic circuit is applicable to perform  
138 complicated calculations. We then used these simulated data to train ANN networks with Keras in  
139 python (Fig. 2A; two hidden layers and each contains four nodes; epochs=1000) with the leave-  
140 one-out method as the validation approach and mean square error (MSE) as the performance  
141 function. To mimic the environment of the genetic regulators, we used the sigmoid function as an  
142 activation function in all nodes in the ANN. We also introduced a 10% Gaussian noise to each  
143 output in the neural nodes to simulate the noise generated by the genetic regulators. We found  
144 that even further limiting the activation function by using the "sigmoid" function and adding 10%  
145 Gaussian noise, our ANN is still able to predict the simulated data as shown in figure 2B  
146 (R=0.9546, p=3.512e-264).

147 To show that our ANN genetic circuit design is a valid solution for real research questions, we  
148 used a previously published (12) gene expression dataset of three classified subtypes of breast  
149 cancer, basal-like, HER2-enriched, and Luminal (A/B) and selected the expression level of ESR1,  
150 PGR, and ERBB2 as input. We built simple ANN circuits with Keras in python (Fig. 2C; one  
151 hidden layer which contains six nodes; epochs=200) to predict breast cancer subtypes. Like the  
152 ANN circuit shown in fig. 2A, we only used the "sigmoid" functions as activation functions in all  
153 nodes. We also introduced a 10% Gaussian noise to each output to mimic the noise of the gene  
154 regulations. As shown in Figure 2D, with the validated data from the published expression profile,  
155 our ANN model performed significantly better in predicting the class of breast cancers (69.29% vs  
156 33.57%; p=0.00165; 10-fold validation) than using pseudorandomly paired expression profile.

157

## 158 Discussion

159

160 In the past decades, the field of biocomputing has been limited to logic gates only, despite the  
161 skyrocketing development in computer science. We here described and computationally proved a  
162 *de novo* method to mimic artificial neural networks with genetic elements. We used two ANN  
163 models to prove the applications of our method in regression and classification analyses and the  
164 possibility to solve artificial and real research problems.

165 It is not the first time that a neural network DNA circuit is being proposed. However, previous  
166 researches (13) only used genetic regulators as Boolean classifiers instead of mimicking the ANN  
167 with genetic elements. Without the properties we proposed and proved in this paper, the  
168 applications of ANN genetic circuits are unfortunately restricted. For instance, if we use the  
169 Boolean neural network to design a gene circuit that is similar to the one shown in figure 2C, we  
170 will not be able to quantify the input. Moreover, such gene circuit will not be able to do any  
171 regression (quantification) analysis, which is demonstrated in the ANN shown in figure 2A. Since  
172 ANNs designed with our novel gene circuit method can do quantification analyses and perform  
173 complicated calculation with fewer neural nodes, we believe our method has a great potential to  
174 be applied in many fields in synthetic biology, such as for pharmaceuticals to test drug efficacy,  
175 researchers to predict cytokine storms, etc. Furthermore, this biocomputing design can be easily  
176 upgraded to other more advanced ANNs, such as recurrent neural networks (RNN; by introducing  
177 a regulator binding site that allows the regulator to regulate itself), which gives researchers a  
178 great flexibility to adapt the ANN to their researches.

179

## 180 Acknowledgments

181

182 We thank Prof. Ting Fung Chan, Dr. Jacky Fong Chuen Loo, and Dr. Yen-Po Chin for their  
183 comments.

184

## 185 References

- 186  
187  
188  
189  
190  
191  
192  
193  
194  
195  
196  
197  
198  
199  
200  
201  
202  
203  
204  
205  
206  
207  
208  
209  
210  
211  
212  
213  
214  
215  
216  
217  
218  
219  
220  
221
1. Tamsir, Alvin, Jeffrey J. Tabor, Christopher A. Voigt. Robust multicellular computing using genetically encoded NOR gates and chemical ‘wires’. *Nature* 469.7329 (2011): 212-215.
  2. Andrews, Lauren B., Alec AK Nielsen, Christopher A. Voigt. Cellular checkpoint control using programmable sequential logic. *Science* 361.6408 (2018).
  3. Chen, Congzhou, et al. DNA Logic Circuits Based on Accurate Step Function Gate. *IEEE Access* 8 (2020): 125513-125520.
  4. Srivastava, Shivani, et al. Logic-gated ROR1 chimeric antigen receptor expression rescues T cell-mediated toxicity to normal tissues and enables selective tumor targeting. *Cancer Cell* 35.3 (2019): 489-503.
  5. Wang, Baojun, Mauricio Barahona, Martin Buck. A modular cell-based biosensor using engineered genetic logic circuits to detect and integrate multiple environmental signals. *Biosensors and Bioelectronics* 40.1 (2013): 368-376.
  6. Courbet, Alexis, et al. Detection of pathological biomarkers in human clinical samples via amplifying genetic switches and logic gates. *Science translational medicine* 7.289 (2015): 289ra83-289ra83.
  7. Sharma, Deepak, Bijendra Kumar, Satish Chand. “Trend analysis in machine learning research using text mining” in *2018 international conference on advances in computing, communication control and networking (ICACCCN)*. (IEEE, Greater Noida, India, 2018), pp. 136-141
  8. Krenker, Andrej, Janez Bešter, Andrej Kos. “Introduction to the artificial neural networks” in *Artificial Neural Networks: Methodological Advances and Biomedical Applications*, Kenji Suzuk, Eds. (InTech, 2011), pp. 1-18.
  9. Murdoch, W. James, et al. Definitions, methods, and applications in interpretable machine learning. *Proceedings of the National Academy of Sciences* 116.44 (2019): 22071-22080.
  10. van Hijum, Sacha AFT, Marnix H. Medema, Oscar P. Kuipers. Mechanisms and evolution of control logic in prokaryotic transcriptional regulation. *Microbiology and Molecular Biology Reviews* 73.3 (2009): 481-509.
  11. Gasperini, Molly, et al. A genome-wide framework for mapping gene regulation via cellular genetic screens. *Cell* 176.1-2 (2019): 377-390.
  12. Mertins, Philipp, et al. Proteogenomics connects somatic mutations to signalling in breast cancer. *Nature* 534.7605 (2016): 55-62.
  13. Qian, Lulu, Erik Winfree, Jehoshua Bruck. Neural network computation with DNA strand displacement cascades. *Nature* 475.7356 (2011): 368-372.

222 **Figures**

223

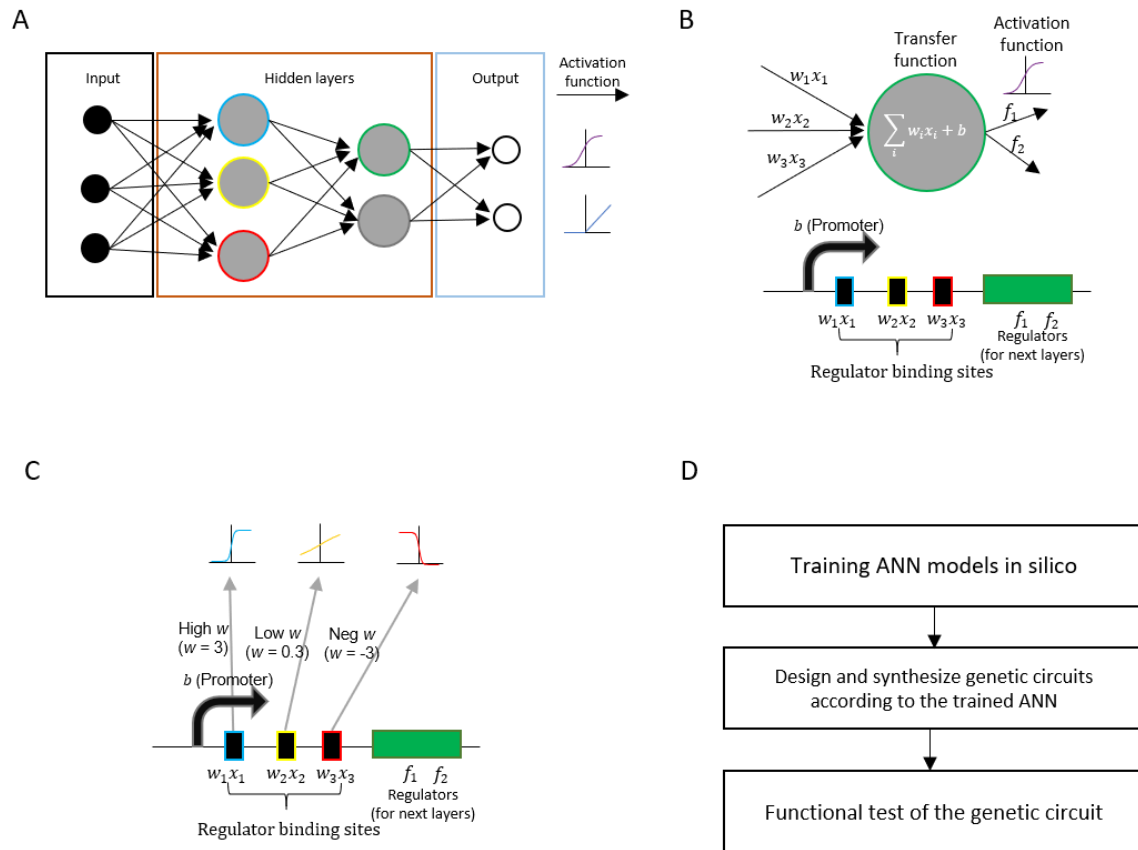

224  
225

**Figure 1.** Method to design genetic circuits mimicking artificial neural networks (ANNs). Schematic diagrams showing (A) an example of an ANN *in silico* (B) transfer and activation function in one node of the ANN (top), and the corresponding genetic circuit design to mimic this node (bottom) (C) exemplary regulations in a genetic circuit to mimic the ANN node with different input weightings (see Eq. 3) (D) flow of designing and testing an ANN genetic circuit. (A-C) The colors of the outlines of regulator binding sites in (B-C) represent the respective regulating nodes from the previous layer as shown in (A).

223

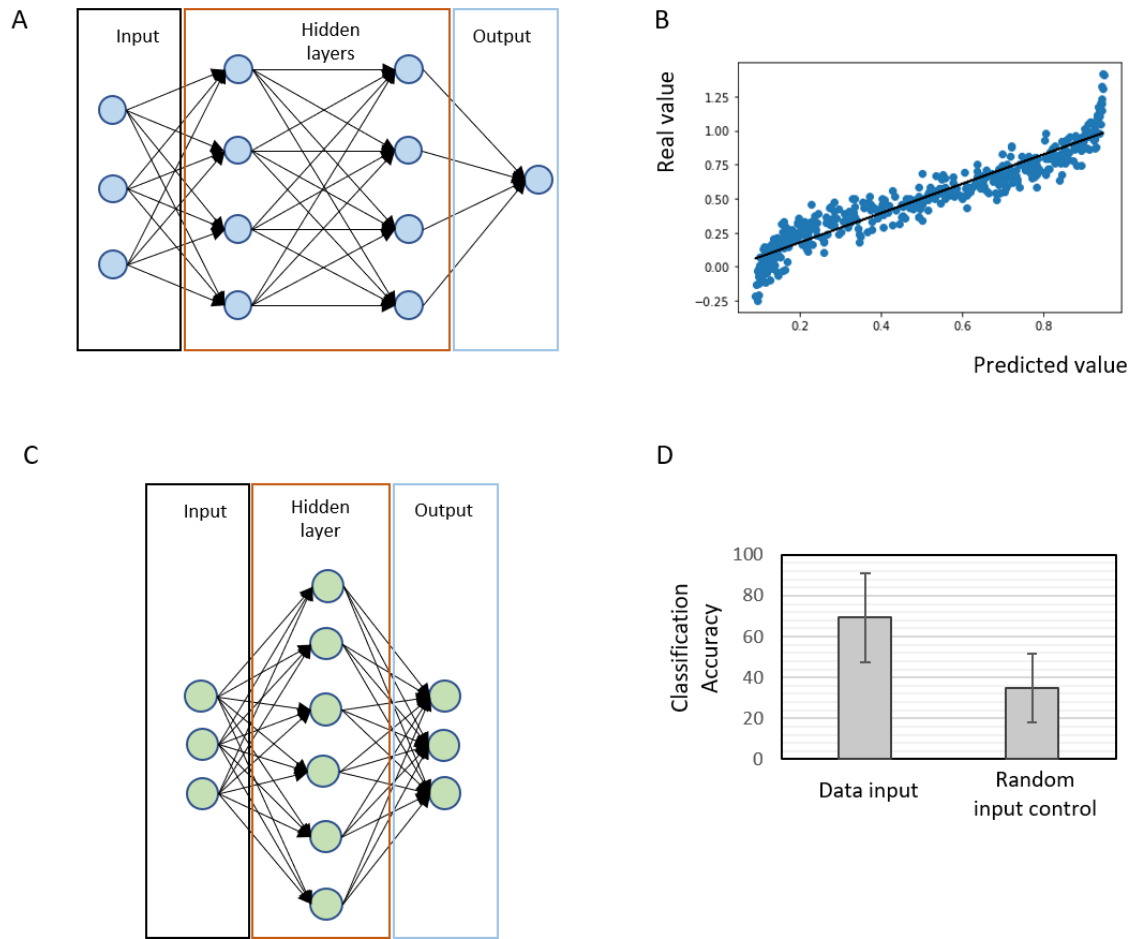

234

235 **Figure 2.** Computational models show that our ANN genetic circuit design can be used for (A-B)  
236 Regression analyses and (C-D) Classification analyses. (A) and (C) showing the respective ANN  
237 design while (B) and (D) showing the respective modeling result of the two types of machine  
238 learning analyses. The black line in (B) represents the Least Squares Regression line. Error bars  
239 in (D) represent the Standard Deviations.  
240
